# Supplementary material for: Gene Panel Sequencing Identifies a Novel RYR1 p.Ser2300Pro Variant as Candidate for Malignant Hyperthermia with Multi-Minicore Myopathy
Source: MDPI journal article supplement (doi:10.3390/genes13101726), 2022-09-26
Supplement: s1 [file s1]

**Supplementary Table S1. A list of 293 selected genes in a Celeemics G-Mendeliome Hereditary Myopathy Panel**

|          |          |         |         |         |         |         |          |         |
|----------|----------|---------|---------|---------|---------|---------|----------|---------|
| AARS     | ABCB7    | ABCD1   | ABHD12  | ACAD9   | ACADL   | ACADM   | ACO2     | ACTA1   |
| ADCK3    | AFG3L2   | AGL     | AIFM1   | ALDH3A2 | AMPD1   | ANO10   | ANO5     | AP4B1   |
| AP4E1    | AP4M1    | AP4S1   | AP5Z1   | APTX    | ARSA    | ATCAY   | ATL1     | ATM     |
| ATP2A1   | ATP7A    | ATP7B   | ATP8A2  | BAG3    | BEAN1   | BIN1    | BSCL2    | C10orf2 |
| C12orf65 | C19orf12 | CACNA1A | CACNA1S | CACNB4  | CAPN3   | CASK    | CAV3     | CCDC78  |
| CCDC88C  | CFL2     | CHAT    | CHRNA1  | CHRNA1  | CHRNA1  | CHRNA1  | CHRNA1   | CHRNA1  |
| CLCN2    | CLN5     | CNTN1   | COL6A1  | COL6A2  | COL6A3  | COLQ    | CPT1B    | CPT2    |
| CRYAB    | CTDP1    | CWF19L1 | CYP27A1 | CYP2U1  | CYP7B1  | DAG1    | DCTN1    | DDHD1   |
| DDHD2    | DES      | DMD     | DNAJB2  | DNAJB6  | DNM2    | DNMT1   | DOK7     | DYNC1H1 |
| DYSF     | EEF2     | EGR2    | ELOVL4  | ELOVL5  | EMD     | ERLIN2  | ETFA     | ETFB    |
| FA2H     | FAM134B  | FGD4    | FGF14   | FHL1    | FIG4    | FKRP    | FKTN     | FLNC    |
| FLVCR1   | FRMD7    | FUS     | FXN     | GAA     | GAD1    | GALC    | GAN      | GARS    |
| GBA2     | GDAP1    | GJB1    | GJC2    | GLA     | GLE1    | GNB4    | GNE      | GOSR2   |
| GPR143   | GRID2    | GRM1    | GYS1    | HADHA   | HADHB   | HINT1   | HOXD10   | HSPB1   |
| HSPB8    | HSPD1    | HSPG2   | IGHMBP2 | IKBKAP  | ISPD    | ITGA7   | ITPR1    | JPH3    |
| KBTBD13  | KCNA1    | KCNC3   | KCND3   | KCNE3   | KCNJ10  | KCNJ18  | KIAA0196 | KIF1A   |
| KIF1B    | KIF1C    | KIF5A   | KLHL40  | KLHL41  | L1CAM   | LAMA1   | LAMA2    | LARGE   |
| LDB3     | LITAF    | LMNA    | LPIN1   | LRSAM1  | MARS    | MARS2   | MATR3    | MED25   |
| MFN2     | MPZ      | MRE11A  | MTM1    | MTMR14  | MTMR2   | MTPAP   | MTTP     | MUSK    |
| MYF6     | MYH2     | MYH7    | MYOT    | NDRG1   | NEB     | NEFL    | NGF      | NIPA1   |
| NOP56    | NTRK1    | OPA1    | OPA3    | OPHN1   | PABPN1  | PANK2   | PDK3     | PDYN    |
| PEX7     | PFKM     | PGAM2   | PHKA1   | PHYH    | PLEC    | PLEKHG5 | PLP1     | PMM2    |
| PMP22    | PNKP     | PNPLA6  | POLG    | POLG2   | POMGNT1 | POMT1   | POMT2    | PRKCG   |
| PRPS1    | PRX      | PTF1A   | PTRF    | PYGM    | RAB7A   | RAPSN   | REEP1    | RNF216  |
| RRM2B    | RTN2     | RUBCN   | RYR1    | RYR2    | SACS    | SBF2    | SCN4A    | SCN9A   |
| SEPN1    | SETX     | SGCA    | SGCB    | SGCD    | SGCE    | SGCG    | SH3TC2   | SIL1    |
| SLC12A6  | SLC16A2  | SLC1A3  | SLC33A1 | SLC39A4 | SLC52A2 | SLC9A1  | SLC9A6   | SMN1    |
| SNX14    | SOD1     | SPAST   | SPG11   | SPG20   | SPG21   | SPG7    | SPTBN2   | SPTLC1  |
| SPTLC2   | STAC3    | STUB1   | SUCLA2  | SYNE1   | SYNE2   | SYT14   | TBP      | TCAP    |
| TDP1     | TECPR2   | TGM6    | TK2     | TMEM240 | TNNI2   | TNNT1   | TPM2     | TPM3    |
| TPP1     | TRIM32   | TRPV4   | TTBK2   | TTN     | TTPA    | TTR     | TUBB4A   | TYMP    |
| VAMP1    | VCP      | VLDLR   | VPS13A  | VPS37A  | VRK1    | WFS1    | WNK1     | WWOX    |
| XK       | YARS     | ZFYVE26 | ZFYVE27 | ZNF592  |         |         |          |         |
